# Supplementary material
Source: HighWire-hosted journal article supplement (https://www.jneurosci.org/highwire/filestream/598771/field_highwire_adjunct_files/5/table_1.pdf)
Supplement: table_1.pdf [file table_1.pdf]

**Supplemental Table 1.** List of primers used to amplify P2X<sub>3</sub> and P2X<sub>2</sub> cDNA in RT-PCR experiments.

|                             | primer sequence                                                     | Length (bp)                                                                   | T <sub>m</sub> (°C) |
|-----------------------------|---------------------------------------------------------------------|-------------------------------------------------------------------------------|---------------------|
| *P2X <sub>2</sub><br>common | Fw: 5'-GGAAGTGTGACCTGGACTTG-3'<br>Rw: 3'-CAGATCCAGGTCTGTAGCTT-5'    | P2X <sub>2a</sub> : 686<br>P2X <sub>2b</sub> : 479<br>P2X <sub>2e</sub> : 416 | 58 °C               |
| P2X <sub>2a</sub>           | Fw: 5'-CAAGGCACCCCTCAAGTAGA-3'<br>Rw: 3'-GCTGGTCCTGGGAGTAGTGA-5'    | 90                                                                            | 60°C                |
| P2X <sub>2b</sub>           | Fw: 5'-GACAAGGTGGTGGACACTC-3'<br>Rw: 3'-CGTGGATGTGGAGTCCTGTT-5'     | 84                                                                            | 60°C                |
| P2X <sub>2e</sub>           | Fw: 5'-GGAAGTGTGACCTGGACTTG-3'<br>Rw: 3'-ATGTGGAGTCCTTGTCAGAAC-5'   | 350                                                                           | 58 °C               |
|                             |                                                                     |                                                                               |                     |
| P2X <sub>3</sub>            | Fw: 5'-CAGGGCACTTCTGTCTTTGTC-3'<br>Rw: 3'-AGCGGTACTTCTCCTCATTCTC-5' | 94                                                                            | 58°C                |
| P2X <sub>2</sub>            | Fw: 5'-TACCATGGGGACTCCAAGAC-3'<br>Rw: 3'-GGGCCATTTTACCCAGAAA-5'     | 95                                                                            | 58°C                |
| β-tubIII                    | Fw: 5'-GGCAACTATGTAGGGGACTCAG-3'<br>Rw: 3'-CCTGGGCACATACTTGTGAG-5'  | 87                                                                            | 58°C                |
| GAPDH                       | Fw: 5'-AACTTTGGCATTGTGGAAGG-3'<br>Rw: 3'-GGATGCAGGGATGATGTTCT-5'    | 122                                                                           | 58°C                |
|                             |                                                                     |                                                                               |                     |

Specific P2X<sub>3</sub> and P2X<sub>2</sub> primers for real time PCR experiments. To amplify P2X<sub>2</sub> isoforms (P2X<sub>2a</sub>, P2X<sub>2b</sub> and P2X<sub>2e</sub>) primers span the P2X<sub>2b</sub> and P2X<sub>2e</sub> splicing boundaries (Koshimizu et al., 2006). Asterisk indicates primers used to amplify all the P2X<sub>2</sub> isoforms with end-point PCR reactions. β-tubulin III (β-tubIII) and GAPDH housekeeping mRNA are also amplified and used for normalization.
